# Supplementary material for: Selective preparation and reaction kinetics of dimethyl carbonate from alcoholysis of methyl carbamate with methanol over ZnAl-LDO
Source: Royal Society of Chemistry journal article supplement (doi:10.1039/d1re00158b), 2021-01-01
Supplement: d1re00158b1.pdf [file d1re00158b1.pdf]

## Supplementary Information

### **Selective preparation and reaction kinetics of dimethyl carbonate from alcoholysis of methyl carbamate with methanol over ZnAl-LDO**

Bo Jia<sup>a</sup>, Xiaoyu Sun<sup>a</sup>, Ming Chen<sup>a</sup>, Jian Jian<sup>b</sup>, Kuiyi You<sup>\*b</sup>, He'an Luo<sup>b</sup>, Yangqiang

Huang<sup>a</sup>, Xiao Luo<sup>\*a</sup>, Bo Jin<sup>a</sup>, Nailiang Wang<sup>c</sup>, Zhiwu Liang<sup>\*a</sup>

<sup>a</sup>College of Chemistry and Chemical Engineering, The Engineering Research Center of Advanced Catalysis, Ministry of Education, Hunan University, Changsha 410082, P. R. China

<sup>b</sup>College of Chemical Engineering, Xiangtan University, Xiangtan 411105, P. R. China

<sup>c</sup>State Key Laboratory of High-efficiency Utilization of Coal and Green Chemical Engineering, Ningxia University, Yinchuan 750000, P. R. China

\*Corresponding Authors:

Dr. Kuiyi You

Email address: youkuiyi@126.com

Dr. Xiao Luo

Email address: x\_luo@hnu.edu.cn; Tel: +86-18627329998

Dr. Zhiwu Liang

Email address: zwliang@hnu.edu.cn; Tel: +86-13618481627; fax: +86-731-88573033

**Table S1.** The CO<sub>2</sub>-TPD results of ZAO-X catalysts.

| Sample  | Desorption temperatures 1 | Basicity | Desorption temperatures 2 | Basicity |
|---------|---------------------------|----------|---------------------------|----------|
|         | (K)                       | (mmol/g) | (K)                       | (mmol/g) |
| ZAO-773 | 645.4                     | 0.08383  | 913.9                     | 0.3459   |
| ZAO-873 | 638.4                     | 0.07953  | 927.3                     | 0.2724   |
| ZAO-973 | 698.9                     | 0.06706  | 920.0                     | 0.1682   |

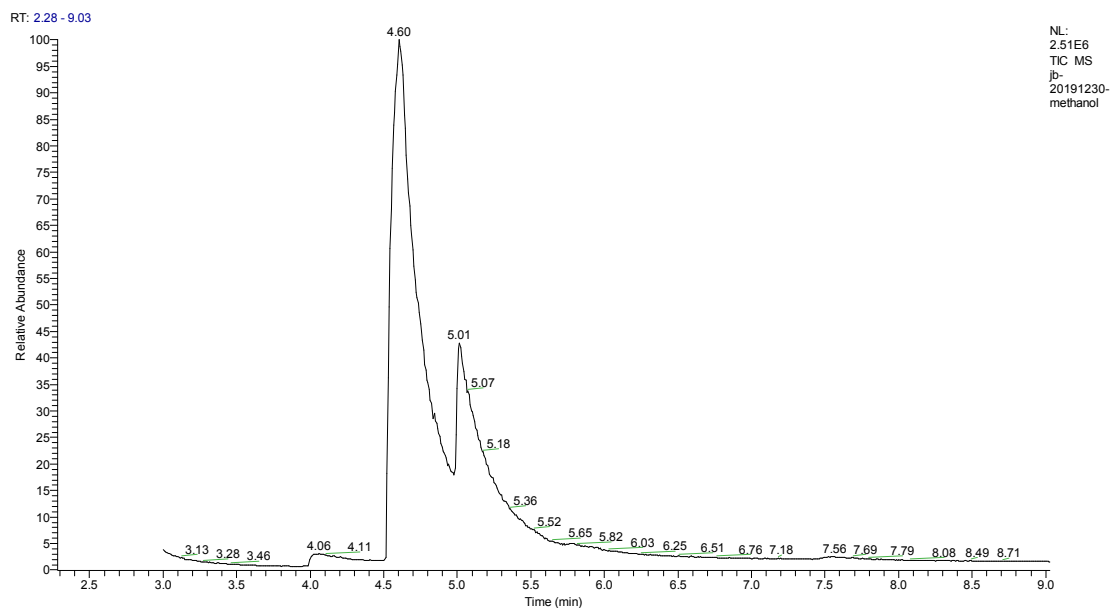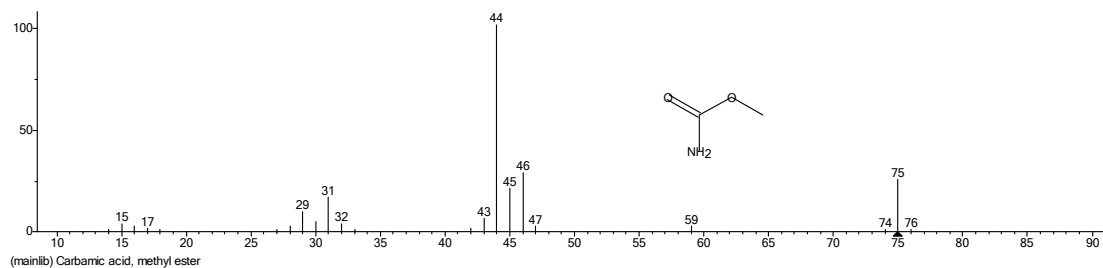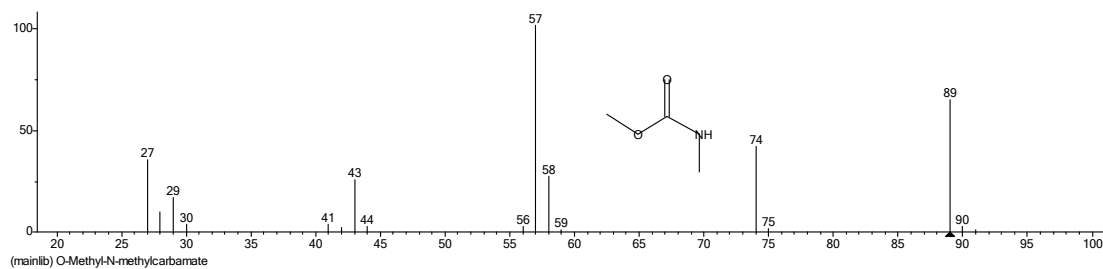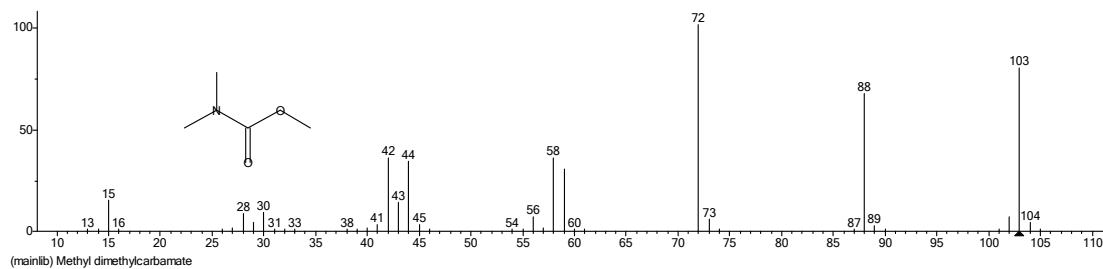

**Fig. S1.** Total ion chromatogram from the GC-MS analysis and the standard mass spectrogram with retention time of 4.06, 4.60 and 5.01 min, respectively.

**Table S2.** The rate constants at different temperatures of Langmuir-Hinshelwood kinetic model.

| Rate constants | Temperature/K |        |        |        |
|----------------|---------------|--------|--------|--------|
|                | 433           | 443    | 453    | 473    |
| $k_1$          | 0.1899        | 0.2783 | 0.4009 | 0.7139 |
| $k_2$          | 0.0430        | 0.0741 | 0.1663 | 0.7016 |
| $k_3$          | 0.0046        | 0.0082 | 0.0167 | 0.0451 |
| $k_4$          | 0.0007        | 0.0019 | 0.0069 | 0.0787 |
| $k_5$          | 0.0389        | 0.0782 | 0.1199 | 0.3472 |
| $k_{DMC}$      | 0.1181        | 0.1594 | 0.2662 | 0.6368 |
| $k_{MC}$       | 0.4547        | 0.7246 | 0.7999 | 0.8390 |
| $k_{NMMC}$     | 0.0196        | 0.0390 | 0.0787 | 0.1986 |
| $k_{CH_3OH}$   | 0.1631        | 0.2578 | 0.4217 | 0.6745 |
| $n_1$          |               |        | 0.18   |        |
| $n_2$          |               |        | 1.58   |        |

**Table S3.** The rate constants at different temperatures of elementary reaction.

| Rate constants | Temperature/K |        |        |        |
|----------------|---------------|--------|--------|--------|
|                | 433           | 443    | 453    | 473    |
| $k_1$          | 0.0019        | 0.0045 | 0.0163 | 0.1129 |
| $k_2$          | 0.0018        | 0.0043 | 0.0121 | 0.1281 |
| $k_3$          | 0.0036        | 0.0056 | 0.0085 | 0.0197 |
| $k_4$          | 0.0000        | 0.0001 | 0.0008 | 0.1074 |
| $k_5$          | 0.0005        | 0.0016 | 0.0040 | 0.0565 |

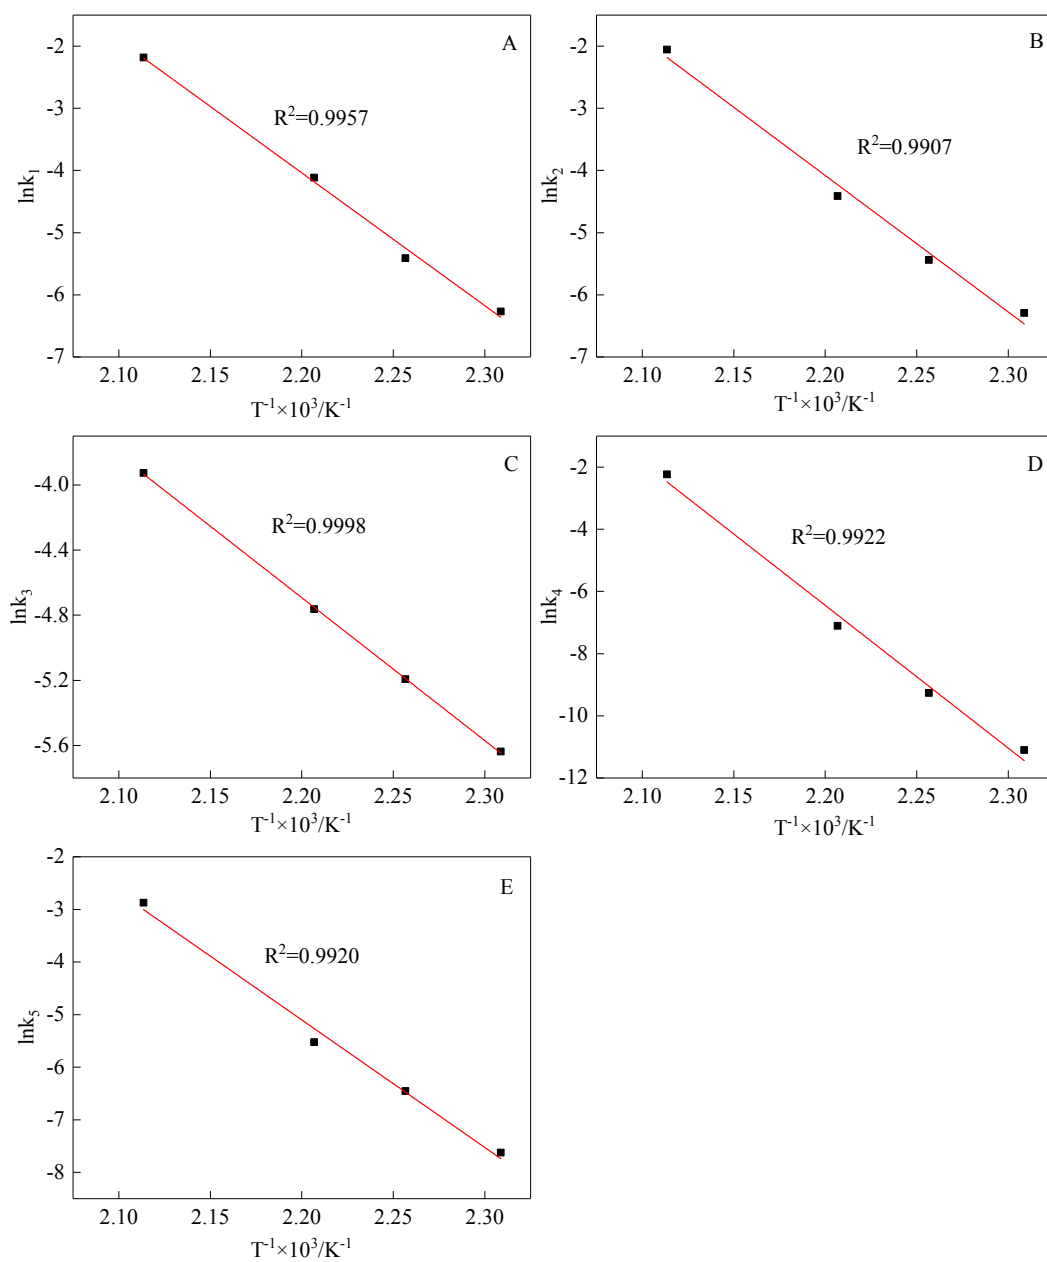

**Fig. S2.** The dependence of the rate constant  $k_i$  ( $i=1-5$ ) on the reaction temperature for elementary reaction.

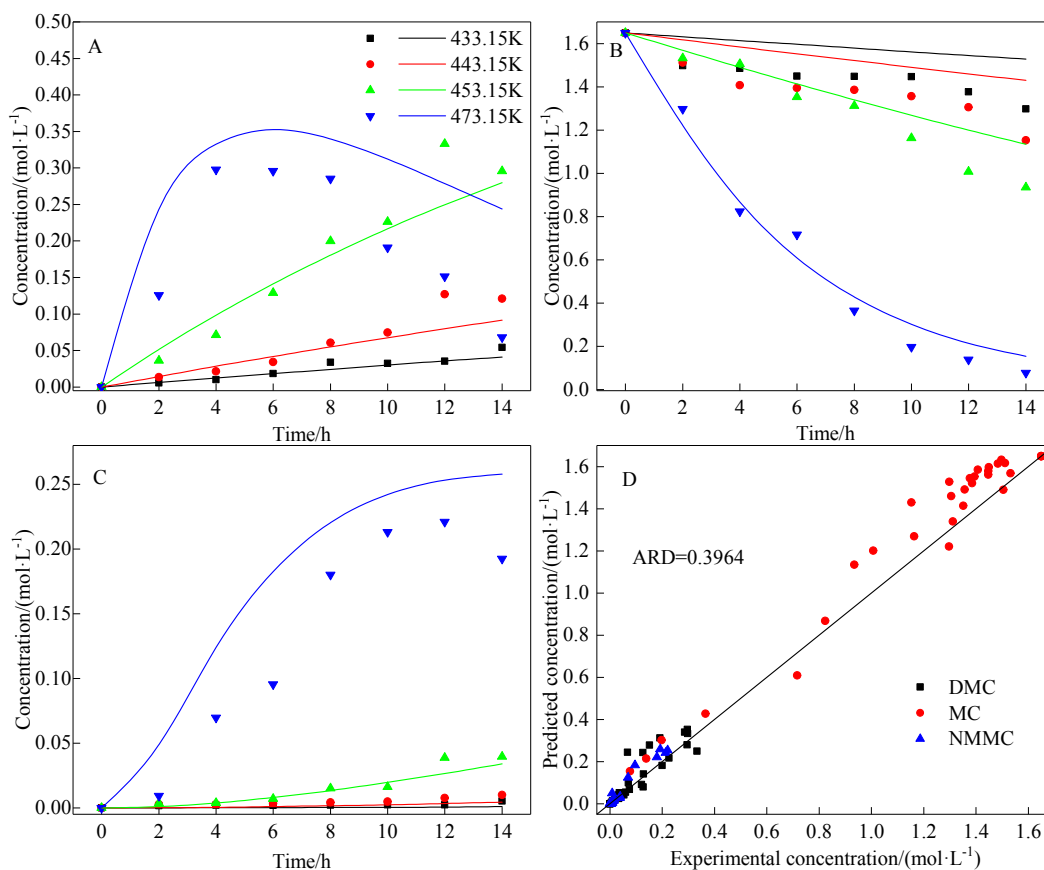

**Fig. S3.** Experimental value and predicted concentration curve of DMC (A), MC (B), NMMC (C) for elementary reaction at different temperature and comparison between experimental and predicted value for all points (D).

**Table S4.** The rate constants at different temperatures and the value of reaction orders of non-elementary reaction.

| Rate constants                                                         | Temperature/K |        |        |        |
|------------------------------------------------------------------------|---------------|--------|--------|--------|
|                                                                        | 433           | 443    | 453    | 473    |
| $k_1$                                                                  | 0.0022        | 0.0063 | 0.0216 | 0.1048 |
| $k_2$                                                                  | 0.0277        | 0.0496 | 0.0783 | 0.1830 |
| $k_3$                                                                  | 0.0032        | 0.0039 | 0.0048 | 0.0064 |
| $k_4$                                                                  | 0.0018        | 0.0040 | 0.0091 | 0.0585 |
| $k_5$                                                                  | 0.0010        | 0.0036 | 0.0193 | 0.2432 |
| $n_1=0.55, n_2=0.74, n_3=1.85, n_4=1.07, n_5=0.70, n_6=0.95, n_7=1.27$ |               |        |        |        |

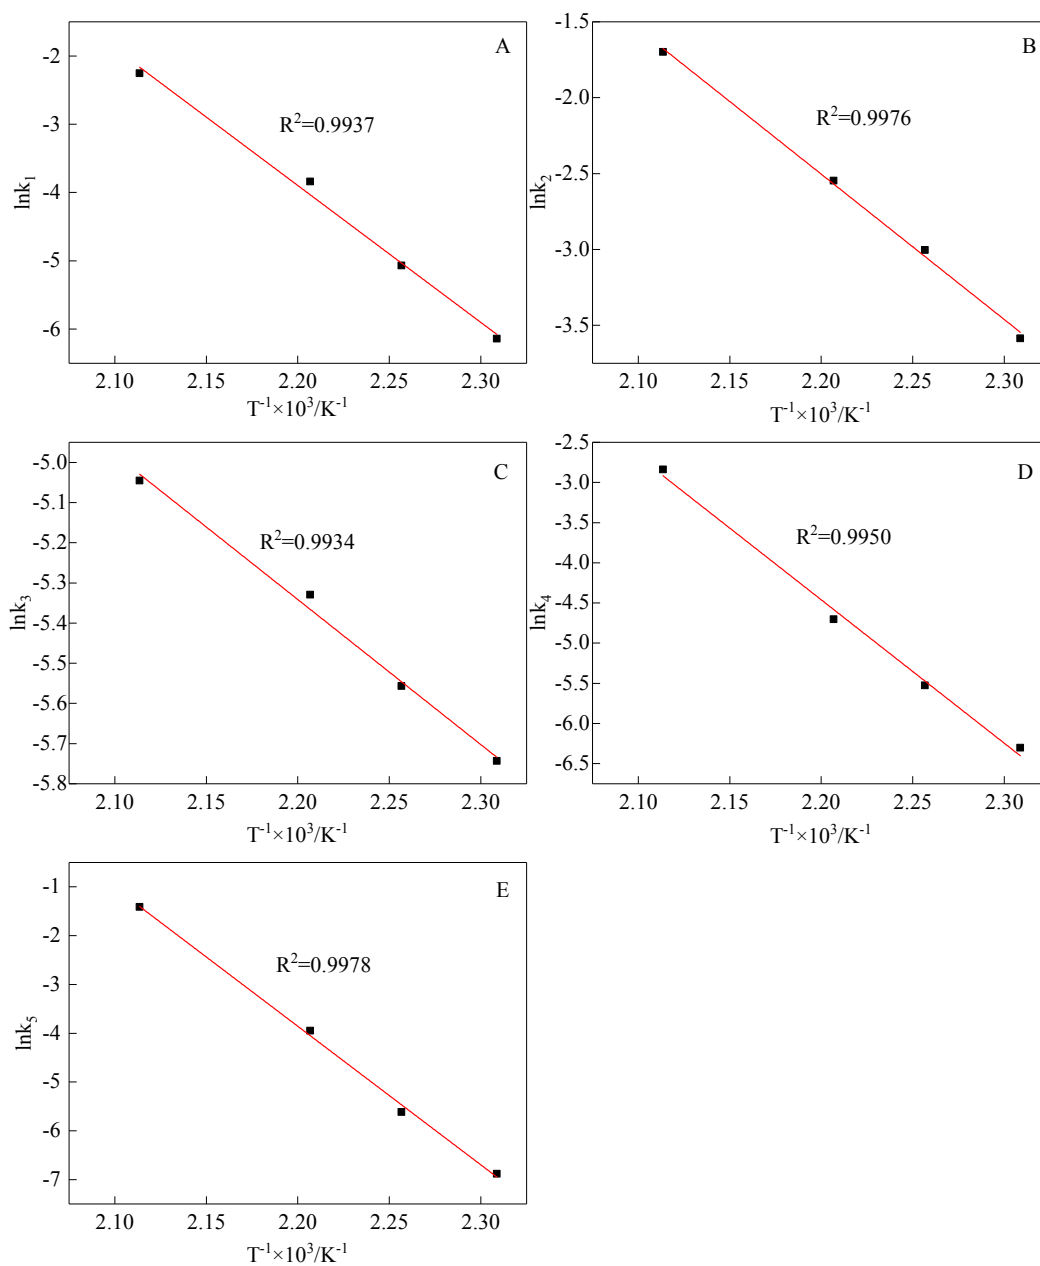

**Fig. S4.** The dependence of the rate constant  $k_i$  ( $i=1-5$ ) on the reaction temperature for non-elementary reaction.

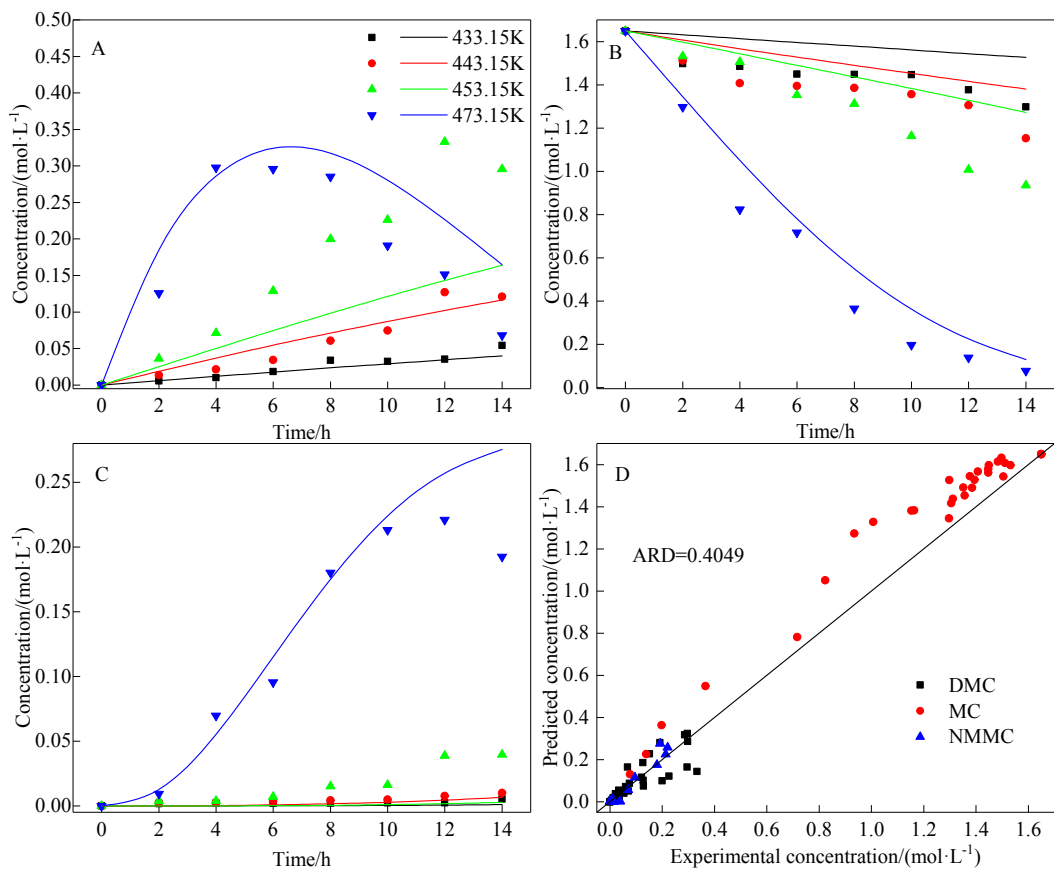

**Fig. S5.** Experimental value and predicted concentration curve of DMC (A), MC (B), NMMC (C) for non-elementary reaction at different temperature and comparison between experimental and predicted value for all points (D).
